# 1 Pilot study of a ketogenic diet in bipolar 2 disorder: a process evaluation

## 3 Authors

4 \*Dr Benjamin P. Rigby<sup>1, 2</sup>  
5 Dr Nicole Needham<sup>3</sup>  
6 Helen Grossi<sup>4</sup>  
7 Ivana Kamenska<sup>5</sup>  
8 Dr Iain H. Campbell<sup>3</sup>  
9 Dr Ben Meadowcroft<sup>6</sup>  
10 Dr Frances Creasy<sup>6</sup>  
11 Cheryl Fisher<sup>4</sup>  
12 Dr Pankaj Bahuguna<sup>7</sup>  
13 Prof John Norrie<sup>5</sup>  
14 Dr Gerard Thompson<sup>3</sup>  
15 Melissa C. Gibbs<sup>3</sup>  
16 Maja Mitchell-Grigorjeva<sup>8</sup>  
17 Dr Ailsa McLellan<sup>9</sup>  
18 Dr Tessa Moses<sup>10</sup>  
19 Dr Karl Burgess<sup>11</sup>  
20 Dr Rachel Brown<sup>11</sup>  
21 Dr Michael J. Thrippleton<sup>3</sup>  
22 Prof Harry Campbell<sup>5</sup>  
23 Prof Daniel J. Smith<sup>3</sup>  
24 Prof Sharon A. Simpson<sup>2</sup>  
25

## 26 Corresponding author

27 \* [benjamin.rigby@newcastle.ac.uk](mailto:benjamin.rigby@newcastle.ac.uk)

28 Population Health Sciences Unit, Newcastle University, Baddiley-Clark Building, Newcastle-upon-  
29 Tyne, NE2 4BN.

## 30 Affiliations

31 <sup>1</sup> Population Health Sciences Institute, Newcastle University, Newcastle-upon-Tyne, UK  
32 <sup>2</sup> MRC/CSO Social and Public Health Sciences Unit, School of Health and Wellbeing, University of  
33 Glasgow, Glasgow, UK  
34 <sup>3</sup> Centre for Clinical Brain Sciences, University of Edinburgh, Edinburgh, UK  
35 <sup>4</sup> Department of Nutrition and Dietetics, Royal Hospital for Children and Young People, Edinburgh,  
36 UK  
37 <sup>5</sup> Usher Institute, University of Edinburgh, Edinburgh, UK  
38 <sup>6</sup> Psychiatry, NHS Lothian, Edinburgh, UK  
39 <sup>7</sup> Health Economics and Health Technology Assessment, University of Glasgow, Glasgow, UK  
40 <sup>8</sup> Bipolar Scotland, Paisley, UK  
41 <sup>9</sup> Department of Paediatric Neurology, Royal Hospital for Children and Young People, Edinburgh, UK  
42 <sup>10</sup> EdinOmics Research Facility (RRID: SCR\_021838), University of Edinburgh, Edinburgh, UK  
43 <sup>11</sup> Centre for Engineering Biology, University of Edinburgh, Edinburgh, UK

**NOTE:** This preprint reports new research that has not been certified by peer review and should not be used to guide clinical practice.

## 1 Abstract

### 2 Background

3 Bipolar disorder is a serious mental illness, which requires new strategies for prevention and  
4 management. Recent evidence suggests that a ketogenic diet may be an effective intervention. This  
5 research aimed to explore the feasibility and acceptability of a ketogenic diet intervention for bipolar  
6 disorder, fidelity to its behavioural components and the experiences of the participants and research  
7 clinicians involved.

### 8 Methods

9 A mixed-methods process evaluation was conducted. Semi-structured telephone interviews  
10 were carried out with 15 participants 1-2 months after completing a 6-8 week modified ketogenic  
11 diet intervention, and 4 research clinicians from the study team following the completion of data  
12 collection. Data were thematically analysed. Fidelity checklists completed by research dietitians  
13 were analysed using descriptive count and percentage statistics. Findings are reported post-hoc,  
14 following the analysis and publication of the main pilot study findings.

### 15 Results

16 Qualitative data indicated that participants had various motives for taking part in the study,  
17 including weight loss. It was important to support people's motives while facilitating clear and  
18 realistic expectations. Despite the challenges of initiating and maintaining a ketogenic diet, including  
19 for some its disruptive effects on daily living, many participants perceived physical and psychological  
20 benefits (e.g. significant weight loss, mood stability and an enhanced ability to focus). A range of  
21 behavioural (e.g. goal setting), social (e.g. family and dietitians) and technological (e.g. apps for  
22 monitoring) support mechanisms were generally considered key facilitating factors. Meanwhile,  
23 dietary preferences, concerns about the diet and its impact, the testing burden and capacity of the  
24 delivery team were perceived as barriers for some. The importance of wider contextual influences  
25 (e.g. the cost of living and sociocultural expectations) were highlighted. Overall, descriptive analyses  
26 indicated moderate-to-good fidelity to the behaviour change components of the study.

27 **Conclusion**

28           We provide novel insight into the experiences of people living with bipolar disorder initiating  
29 and following a ketogenic diet, as well as those of research clinicians who support the intervention.  
30 Future trials may benefit from increased clinical research capacity, better-defined entry and exit  
31 routes, additional interpersonal support, and greater understanding of how social and societal  
32 factors impact participation.

33 **Trial registration**

34 Study registration number: ISRCTN6163198 (02 March 2022)

35

36 **Keywords**

37 Bipolar type I or II disorders; process evaluation; neurophysiology; metabolic psychiatry.

Pre-print version

## 38 Background

39 Bipolar disorder (types I and II) is a serious mental illness characterised by episodes of  
40 elevated mood and depression [1]. It has a lifetime risk of 1-2% [2] and is considered among the  
41 most challenging psychiatric disorders to manage [1]. Typically presenting during early adulthood,  
42 bipolar disorder is associated with significant economic and societal impact, comorbidities and high  
43 mortality [3, 4]. Life expectancy among people with this disorder may be up to 20 years less than the  
44 general population, with suicide and cardiovascular disease being leading contributors to excess  
45 deaths [1, 3]. However, current strategies for prevention and management of bipolar disorder are  
46 suboptimal and new interventions are required.

47 The ketogenic diet, premised on very low carbohydrate and very high fat intake [5],  
48 represents an intervention with emerging therapeutic potential across a range of psychiatric  
49 conditions, including bipolar disorder [6-9]. It is proposed that this diet may contribute to more  
50 stable energy production in the brain through the metabolism of ketones as an alternative energy  
51 source to glucose [10], thus overcoming issues of glucose metabolism and insulin resistance that are  
52 common among people with bipolar disorder [11-14]. However, despite promising case reports,  
53 there remain no randomised controlled trials (RCTs) examining the effect of a ketogenic diet in  
54 bipolar disorder.

55 A recent four-month pilot trial investigated the effects of a modified ketogenic diet on  
56 individuals with schizophrenia or bipolar disorder with existing metabolic abnormalities [9]. Among  
57 participants adherent to the diet, metabolic improvements were reported (*e.g.* reduced BMI and  
58 waist circumference measurements), as well as enhanced life satisfaction and sleep. In another  
59 recent pilot study, Needham *et al.* investigated the recruitment, feasibility and acceptability of a  
60 modified 6-8 week ketogenic diet in bipolar disorder among euthymic participants (*i.e.* those in a  
61 period of emotional homeostasis) [4, 5]. The key findings were that intervention recruitment and  
62 retention were feasible, and that most participants reached and maintained ketosis during the study

63 period. Combined with promising outcomes data from this study (publication forthcoming [15]),  
64 these findings suggested that a full clinical trial is warranted [4, 15]. To complement this latter pilot  
65 study and inform the development of a future RCT (*e.g.* through understanding factors that  
66 influence study design or participant adherence to intervention), we conducted a mixed-methods  
67 process evaluation of the pilot post-intervention.

68 Process evaluations differ to outcome-focused research by exploring how interventions work  
69 in practice through increasing understanding of the implementation of interventions, the  
70 mechanisms of impact and the context that shapes these two factors [16]. Both quantitative and  
71 qualitative analyses can contribute to these aims [16, 17]. In the piloting phase, process evaluation  
72 helps understand fidelity, feasibility and acceptability, and optimise the future design and evaluation  
73 of full-scale trials [16]. Such considerations are particularly important in developing trials for  
74 population groups with severe mental illness, such as bipolar disorder, who may have complex  
75 barriers to research involvement [18]. For example, people with bipolar disorder are at risk of  
76 therapeutic misconception or optimistic bias when presented with research information [19], and  
77 often experience impaired concentration or memory [20]. This may affect the acceptability of and  
78 adherence to interventions such as the ketogenic diet, which is known to be challenging albeit  
79 achievable among adults [21-23]. Previous research has indicated that numerous components may  
80 be important to support adherence to and outcomes from dietary interventions for people with  
81 bipolar disorder, including goal setting, regular and tailored support from healthcare and allied  
82 professionals, and psychological therapies [24]. However, no studies have examined these and  
83 associated factors in relation to the ketogenic diet as a therapeutic intervention for bipolar disorder.

84 As part of a wider pilot trial [4, 15], this research aimed to further explore the feasibility and  
85 acceptability of the ketogenic diet intervention and elements of the study design, examine fidelity to  
86 the behavioural components of the intervention, and explore the experiences of participants and  
87 research clinicians involved in the research.

## 88 Methods

### 89 The pilot study

90 A favourable ethical opinion was obtained for this study by the South East Scotland Research  
91 Ethics Committee 02 (approval number: 22/SS/0007) and it was approved by NHS Lothian Research  
92 and Development. The primary aim of the pilot study was to assess recruitment, acceptability and  
93 feasibility of a 6-8 week trial of a modified ketogenic diet for individuals with bipolar disorder.  
94 Secondary objectives were to assess the relationships of a biomechanical, metabolomic and brain  
95 imaging biomarkers with clinical and functional outcomes. In brief, the intervention comprised a diet  
96 with estimated energy requirements of approximately 60-75% from fat, 5-7% from carbohydrate and  
97 additional calories from protein [5]. Participants received tailored support from an experienced  
98 ketogenic dietitian, and had access to a psychiatrist on the research team if required. The support  
99 package was informed by the COM-B framework [25] and behaviour change theories [26, 27].  
100 Twenty-seven euthymic individuals were recruited into the study. Full details about the study design,  
101 intervention components and participants are published elsewhere [4]. The clinical and functional  
102 outcomes will also be presented in a forthcoming publication [15]. The remainder of this paper  
103 reports on sampling, recruitment, procedures and findings for this additional process evaluation  
104 component of the study.

### 105 Participants

106 Fifteen of the 27 individuals recruited into the pilot study were purposively sampled and  
107 agreed to be interviewed. We aimed to achieve variation in participants' age, gender, socioeconomic  
108 background and whether they completed the 6-8 week intervention. The Scottish Index of Multiple  
109 Deprivation (SIMD) was used as proxy measure of socioeconomic background, recording  
110 participants' residential status on a scale of 1<sup>st</sup> decile (most deprived) to 10<sup>th</sup> decile (least deprived).  
111 Participant characteristics are reported in Table 1.

**Table 1.** Participant characteristics (pilot study: n = 15)

| Characteristics           |                                                                                                                                                                                                                                                              |
|---------------------------|--------------------------------------------------------------------------------------------------------------------------------------------------------------------------------------------------------------------------------------------------------------|
| Age                       | Mean = 48.5 years (range 37-54)                                                                                                                                                                                                                              |
| Sex                       | Female = 10<br>Male = 5                                                                                                                                                                                                                                      |
| Place of residence (SIMD) | 1 <sup>st</sup> and 2 <sup>nd</sup> deciles = 0<br>3 <sup>rd</sup> and 4 <sup>th</sup> deciles = 4<br>5 <sup>th</sup> and 6 <sup>th</sup> deciles = 1<br>7 <sup>th</sup> and 8 <sup>th</sup> deciles = 3<br>9 <sup>th</sup> and 10 <sup>th</sup> deciles = 7 |

112

113 Table 1 shows that two-thirds of the participants were female and two-thirds were resident  
114 in areas in the four least deprived SIMD deciles. One of the 15 discontinued the diet before the 6-8  
115 week intervention periods was completed. Four research clinicians (all female) involved in the  
116 delivery of the intervention were also purposively recruited and agreed to be interviewed: two  
117 research psychiatrists (one of whom also acted as study coordinator) and two research dietitians.  
118 The descriptive quantitative analysis of the fidelity checklist comprised data from the 25 participants  
119 for whom at least one diet review meeting was recorded.

## 120 Procedure

### 121 Qualitative component

122 One-to-one semi-structured telephone interviews were conducted with study participants 1-  
123 2 months after completing the 6-8 week diet intervention, and research clinicians implementing the  
124 intervention following the completion of the intervention component of the study. The use of a  
125 semi-structured interview format allowed flexibility to ask additional questions based on the  
126 participants' responses, and a set of prompt questions were used to stimulate discussion if needed  
127 [28]. Prior to the interviews, all participants were asked to read an information sheet and provide  
128 informed consent. All interviews were conducted by BPR, recorded on an encrypted electronic  
129 device, transcribed intelligent verbatim and the transcripts de-identified. Interviews with the pilot  
130 participants lasted between 37 and 98 minutes. They were structured around the following topics:  
131 recruitment into the study; experiences of being a research participant; the diet; the support  
132 package; perceived outcomes; and areas for suggested development. Additional file 1 provides the

133 interview guide. Interviews with research clinicians lasted between 22 and 45 minutes, and were  
134 structured around: general experiences; implementing the study; engagement with participants; and  
135 future directions (see Additional file 2 for the interview guide).

### 136 Quantitative component

137 Data were taken from the 104 diet review meetings in which fidelity checklists were  
138 completed in conversation between participants and a research dietitian. The checklists (see  
139 Additional file 3) were used by dietitians to ensure coverage of key behavioural strategies that  
140 underpinned the intervention: i) providing information on the benefits of changing diet; ii) goal  
141 setting and creating an action plan; iii) social support; iv) relapse prevention strategies; v) reviewing  
142 the outcome of goals and plans; vi) discussing (potential) barriers and how to overcome them; vii)  
143 self-monitoring/feedback; viii) discussing performance and providing feedback; ix) discussing  
144 environmental restructuring; x) discussing how doing well could be rewarded. Hand-written  
145 checklists were compiled and cleaned by HG, IK and NN, then converted into digital MS Excel records  
146 by BPR.

### 147 Analysis

148 Analyses were initially performed by BPR both alongside and after the examination of study  
149 outcomes; findings are reported post-hoc [16]. Qualitative data were analysed using an inductive  
150 thematic approach based on Braun and Clarke's original six-step method [29]. SAS reviewed two  
151 transcripts independently and interpretation of the data were discussed between BPR and SAS, as  
152 well as in team meetings. Quantitative data were initially analysed by BPR using descriptive counts  
153 and percentages to examine the proportion of meetings in which each behavioural strategy was  
154 covered and patterns in their use. Two sets of findings were generated. First, an overall assessment  
155 of fidelity that included all 25 participants with completed checklists. Second, an adjusted  
156 assessment that only included data from participants that completed the diet at 6-8 weeks follow-up  
157 (n=20). Data were not included in either analysis from any of the participants' first meetings for two  
158 components, which by definition were not relevant to be discussed at that time point (reviewing



159 goals and plans; and discussing performance). The interpretation of data were discussed at research  
160 team meetings.

## 161 Results and discussion

### 162 Qualitative findings

163 Five salient themes were identified in the qualitative data relating to recruitment, feasibility,  
164 acceptability and implementation of the ketogenic diet intervention. A summary of themes and their  
165 associated sub-themes is provided in Table 2.

**Table 2.** Summary of themes and sub-themes

| Main theme                                   | Subthemes                       |
|----------------------------------------------|---------------------------------|
| Encouraging entry and supporting exit        | Addressing participant motives  |
|                                              | Setting clear expectations      |
|                                              | Providing exit routes           |
| Challenging but potentially transformational | A big undertaking               |
|                                              | Perceived impact                |
| Intervention facilitators                    | Behavioural support mechanisms  |
|                                              | Interpersonal support           |
|                                              | Teamwork                        |
|                                              | Technology                      |
| Intervention barriers                        | The testing burden              |
|                                              | Capacity of the delivery team   |
|                                              | Dietary preferences             |
| The wider context                            | Participants' concerns          |
|                                              | Social pressures                |
|                                              | Keto in a cost-of-living crisis |

166

#### 167 Theme 1 – Encouraging entry and supporting exit

168 Findings from the pilot study suggested that recruitment and retention of participants was  
169 feasible [4]. This was reflected in the majority of experiences articulated through the interviews.  
170 While recruitment to this pilot was conducted primarily through Bipolar Scotland, the underlying  
171 mechanisms that encouraged entry into the study may be applicable in alternative contexts. For  
172 example, providing study-related resources so that people are *'able to learn quite a lot about it*  
173 *before'* participation, through the website, *'factsheets, and information about the study* (Participant  
174 7).' Further, some participants valued hearing the experiences of a member of the research team  
175 who has a diagnosis of bipolar disorder and follows a ketogenic diet.

176 He spoke, his presentation was excellent. And he lives with bipolar and he's been on the  
177 ketogenic diet for about eight years and he could talk to the benefits that he felt. So it was  
178 very powerful (Participant 15).

179  
180 Given that self-efficacy among people with bipolar disorder may typically be low [30], such  
181 testimonies have the potential to enhance people's belief in their abilities through encouragement  
182 and vicarious experiences [26], thus supporting them to engage with a novel and challenging activity,  
183 such as following a new diet. This approach may also support motivation through feelings of  
184 relatedness [31], and help set clear expectations of the study.

#### 185 *Addressing participant motives*

186 Participants entered the pilot study with various experiences of living with bipolar disorder.  
187 Some had been diagnosed many years ago, others as little as six-to-nine months prior to  
188 recruitment. Their ongoing treatment and management varied, as did their motives for participating.  
189 While participants sought alleviation of their symptoms, four wider and potentially stronger motives  
190 were identified. For some, the study represented hope. This was unsurprising given the challenge of  
191 managing this severe mental illness [1, 4].

192 I hoped that the keto diet would do something I haven't been able to do on my own ... I'd  
193 hoped that the keto diet would be a miraculous cure. I was looking for help or support to try  
194 and help me get better (Participant 8).

195  
196 Other participants cited a desire to reduce drug-use and challenge *'the current medical model for*  
197 *someone who has a diagnosis of bipolar [which] is to take medications and lower your expectations*  
198 *(Participant 5).* Altruism was a third motive identified in the data.

199 I decided to participate because I felt like it was a very worthwhile thing to do ... for other  
200 people and in the future. And for the knowledge that will be obtained from it, they're  
201 actually treating people (Participant 1).

202  
203 Eighteen of the 27 participants in the pilot study were overweight or obese [4], which is common  
204 among people with bipolar disorder [32]. For many, weight loss was a primary motive.

205 The anti-psychotic drugs make me crave sugar and my weight has just yo-yoed up and down.  
206 And I know that I should be eating low carb, it seems to work for me, it seems to really work  
207 for the weight loss. However, any time I've tried it before it just sends my mood loopy. I take

208 more anti-psychotics, which makes me crave the sugar, and then it just goes round and  
209 round ... as soon as I saw it, I was like, "I want to take part in this (Participant 13)."  
210  
211 In future trials, it will be important to ensure that communications and recruitment strategies  
212 support a range of potential motives, which may extend beyond direct presentations of bipolar  
213 disorder. While significant weight loss has been observed in this pilot study and others [9, 15], the  
214 weight loss motive, as well as hope, should be addressed cautiously, given both the absence of high-  
215 quality RCT evidence of the effectiveness of interventions used in the management of obesity in  
216 people with bipolar disorder [32], and the risk of therapeutic misconception or optimistic bias in this  
217 population subgroup [19]. This reinforces the need for clear expectations around involvement in  
218 studies.

#### 219 *Setting clear expectations*

220 Given how challenging it can be to follow a ketogenic diet [5], it is important that potential  
221 participants are fully informed about the reality of participating in such a study. Several participants  
222 felt that the expectations were clear and realistic, which seemed in some cases to be linked to past  
223 experiences of medical intervention or research.

224 I'd been told before the appointments that'll last this length of time ... And I knew in  
225 advance about the once a week phone calls. And taking the blood samples and texting the  
226 results. Nothing took me by surprise ... blood tests, I've had plenty of them. I took part in  
227 some research when I was first psychotic and even had the full brain scan at that point  
228 (Participant 13).

229  
230 Meanwhile, others felt that expectations around the diet and testing regimens could be made  
231 clearer prior to engagement.

232 And I have to say, certain things, particularly in the first week, really threw me. I had no idea  
233 that's what I was going to be involved in (Participant 15).

234 These experiences led the research clinicians to reflect and adjust their practice as the pilot  
235 continued. However, they also noted that baseline expectations were very high and may need to be  
236 managed carefully, as noted in previous research among people with bipolar disorder [33].  
237 Furthermore, in pharmaceutical contexts, expectations of bipolar disorder treatment can

238 significantly influence adherence to behaviours [34], and such factors should not be discounted in  
239 behavioural interventions.

240 I think we have discussed a bit as a team, and I think it would be really helpful to spend a  
241 little bit more time with people before they started the study to make sure that they were  
242 really clear exactly what the study would entail (Research Psychiatrist 1).

243  
244 It was a different group with different needs, with different expectations, and the  
245 expectations, I would say, of the participants was extremely high. Because there's so very  
246 little in terms of what can actually be done for bipolar disorder ... the fact that looking to use  
247 this diet, I would say that the expectations of the participants were very high. Maybe that's  
248 something that we need to be very aware of (Research Dietitian 1).

249  
250 *Providing exit routes*

251 During the pilot, 77% (20 of 26) participants remained on the diet until 6-8 week follow-up  
252 [4]. One-third were reported to maintain their diet post cessation of the study period [15]. When  
253 interviewed one-to-two months post-follow-up, seven of 15 participants either stated that they  
254 remained on the diet, or expressed a desire to try the diet again. However, in most cases they  
255 reported concerns about the loss of support that came with being part of a research study, which  
256 may be compounded by the complexity of the ketogenic diet [5].

257 It's not a simple thing and I was doing quite a lot of calculations and all that kind of stuff.  
258 And I suppose coming to the end of it and trying to find out how I can continue ... because it  
259 really helped me, I felt so much better ... I'm trying to find a way to do it. I'm not sure any of  
260 these ways [available online] are going to be as effective as the medical version, but I'll keep  
261 experimenting. I think my understanding was that ... staying on the version that I was on  
262 with the study isn't advisable without supervision (Participant 6).

263  
264 One of the research clinicians also reflected on the need for robust clinical protocols to support  
265 cessation or withdrawal from the dietary intervention.

266 I wasn't maybe exactly sure how to explain to people how the withdrawal process worked or  
267 what next ... and as you said, providing any aftercare reports. Some people just completely  
268 disengaged, so it was really difficult, we couldn't even get in contact with them after they'd  
269 made that decision. And I suppose that's another thing, should there be a process in place as  
270 to what to do if somebody completely disengages (Research Psychiatrist 1)?

271  
272 Anecdotal evidence suggests that trial participants experience various emotions when their  
273 involvement in a study ends, with isolation and uncertainty among other feelings being common  
274 [35]. Recognising this is particularly important for studies involving people with bipolar disorder,

275 who may experience greater social isolation and loneliness compared to the general population [36,  
276 37]. Findings from this study highlight the need to support participants' motives both pre- and post-  
277 intervention, which includes setting clear expectations. This will enable participants to appreciate  
278 the potential challenges and rewards associated with interventions such as the ketogenic diet.

## 279 Theme 2 – Challenging but potentially transformational

280 In general, participants felt that being on the ketogenic diet was challenging. However, many  
281 of those interviewed considered the undertaking to be acceptable given the perceived benefits. For  
282 some, this was a transformational lived experience.

### 283 *A big undertaking*

284 Transitioning to and maintaining a ketogenic diet can be challenging for adults [21-23]. In  
285 this study, some participants recognised the value of being '*recommended that I staged the*  
286 *introduction of ketogenic meals* (Participant 2),' and there is some evidence to support this from  
287 other clinical settings, which suggests better toleration [38]. For many, maintaining a daily blood  
288 ketone testing regimen, shopping and preparing food were perceived to be '*very time consuming*  
289 (Participant 10)' and take considerable effort and preparation, particularly in the early stages of the  
290 intervention period, thus reflecting previous research.

291 It was quite tricky at first, but I quickly realised what was making it tricky was cooking for the  
292 other four [in the home]. And at first, I was like, I'll try and incorporate meals that we can all  
293 eat. And then I was like no, that's not going to work ... So it was kind of like having to think  
294 about two lots of eating, what I was eating and what they were eating. But that got easier  
295 (Participant 19).

296  
297 For several participants, this balancing of the diet with family commitments, including meal times,  
298 was just one of several ways in which the intervention was considered disruptive to everyday  
299 activities. Often, these perceptions related to the social aspect of eating.

300 Like how am I going to socialise with food so much a part of that in our culture? So I hadn't  
301 somehow realised that that could be a barrier. And then carrying around the things that I  
302 needed with me if I was going somewhere. I decided not to go anywhere for the first couple  
303 of weeks to keep it easier. I think it might have been helpful to just know that, maybe you  
304 put this in place at a point where you can just take your time whilst you get into ketosis  
305 (Participant 1).

306  
307 For a minority of participants, this sense of challenge may have been exacerbated due to cognitive  
308 difficulties.

309 I think probably the main barrier was lithium because measuring things and then going back  
310 to the charts ... When I started having to calculate things, and I don't necessarily think it  
311 would be difficult for an ordinary person, to be honest, but for me it was like, oh my God,  
312 this is like a major mental meltdown situation (Participant 14).

313  
314 Impaired concentration and memory are common among people with bipolar disorder [20].  
315 However, similar symptoms may manifest with the onset of 'keto flu', which is a cluster of transient  
316 symptoms that can be reported as occurring within the early weeks of a ketogenic diet [39]. While it  
317 is not possible to discern the relative impact of these two possibilities in our study, it highlights a  
318 potential barrier.

319 These findings indicate that people with bipolar disorder may find the early stages of being  
320 on a ketogenic diet to be a considerable adjustment before familiarisation, particularly where family  
321 circumstances are considered. They suggest that additional support may be required in the initial  
322 few weeks, which are likely to be the most difficult [40], enabling participants to engage for long  
323 enough to experience perceived benefits.

#### 324 *Perceived impact*

325 The main outcome findings of this study are reported elsewhere [15]. However, all  
326 participants discussed their perceptions of the study's impact, which often corroborated  
327 quantitative observations of weight loss and reduced mood lability, as well as results in other studies  
328 [9]. Additional benefits such as self-control and discipline were reported (Additional file 4 provides a  
329 full list of benefits reported during interviews).

330 I think even within the first two weeks, I felt like I got my brain back. It was an exceptionally  
331 stressful time, and it was nothing to do with the study. It just was in my life, like a lot of  
332 stress or highly stressful things to deal with. But I managed okay. I kept things to myself. I  
333 kept thinking to myself other times in my life this would've sent me under by now. These  
334 things would've sent me under, into some spiral of either high anxiety or depression  
335 (Participant 1).

336

337 As soon as I had used the keto for two or three days, I just felt more relaxed, more peaceful  
338 than I think I've ever felt in my life. And in that whole period since then, I don't think I've  
339 experienced any fear or anxieties, hardly any agitations. This has always been a big problem,  
340 I seem to get very angry, so clearly that's disappeared (Participant 14).

341  
342 I've lost a stone and a half, probably more actually, nearer two stone. So that was a big thing  
343 for me (Participant 11).

344  
345 These findings are particularly noteworthy given the difficulty of managing bipolar disorder [1], and  
346 point toward the therapeutic potential of the ketogenic diet to address both a key characterisation  
347 of this severe mental illness (i.e. changes in mood) and commonly associated cardiometabolic risk  
348 factors in this population. The potentially transformational extent of these perceived and observed  
349 benefits for some participants may help explain why they undertook and continued a significant  
350 lifestyle intervention, even after the study had finished. These perceived outcomes contributed  
351 strongly to its sense of acceptability, despite the challenges.

352 However, many participants perceived a range of side-effects from the intervention that, as  
353 reported elsewhere, were generally mild and usually resolved with dietary adjustments [4]. For  
354 some, the lack of noticeable improvement in their mental or physical health status could be  
355 disappointing.

356 It's likely out of frustration and that was just because I wasn't seeing any positive changes as  
357 in weight loss, like proper changes ... My mood would really dip when I did my blood tests,  
358 my finger prick and the ketones were high or the glucose ... I was hypoglycaemic for a couple  
359 of times. But I got really down when I'd done everything and the ketones were high [but saw  
360 no results] (Participant 15).

361  
362 Examples of negative experiences are also included in Additional file 4. To manage expectations, and  
363 overcome set-backs or side-effects, it is possible that the intensive tailored support received by  
364 participants in this pilot [4] may have triggered key mechanisms that facilitated adherence.

### 365 Theme 3 – Intervention facilitators

#### 366 *Behavioural support mechanisms*

367 Previous research has tended to overlook the importance of different behaviour change  
368 techniques in dietary interventions [41]. Prompted by the intervention fidelity checklist (see  
369 Additional file 3 and quantitative findings for more detail), research clinicians supported participants

370 to implement a range of behavioural support mechanisms tailored to participants' needs, which they  
371 reported as being beneficial for adherence to the diet and testing regimen. These included action  
372 planning [42], behavioural prompts [43] and self-monitoring [44].

373 I've got a reminder in my work calendar, and then I've got a reminder in my personal  
374 calendar, and then if I've got a hectic day, I'm also setting a phone reminder so that an alert  
375 goes off (Participant 5).

376  
377 I think it was just working out a good system, because we eventually got, like, a small diary,  
378 and then just wrote the recipes in it (Participant 7).

379  
380 Another key behavioural strategy was setting and evaluating goals [45].

381 Every week we looked at what their goals were going to be for the next week, if we made  
382 changes, what kind of adverse events were they having (Research Dietitian 1)?

383  
384 While importantly goal setting primarily supported adherence to the diet [46], the intervention may  
385 have also prompted some participants to reflect or act on bigger lifestyle goals. It is suggested that  
386 interventions for people with bipolar disorder need to extend beyond a narrow focus on adherence  
387 through traditional behaviour change techniques, to consider self-worth [47] and problem-solving  
388 that may underpin longer-term behavioural change [24]. For example, *'my diet generally was*  
389 *absolutely shocking, so I figured it would encourage me at least to have some clear goal, even if it*  
390 *was from a physical health point of view* (Participant 11).*'* These wider goals may have been  
391 facilitated through behavioural and interpersonal support.

#### 392 *Interpersonal support*

393 It was apparent that social support provided to participants by family, research clinicians  
394 involved in the study, and existing care teams was crucial, leaving some participants doubting the  
395 potential for the intervention to work outside the support of a research project.

396 And [my spouse] just helped me out, like she said, "if you're having a brain meltdown just  
397 grab me, I'll fix it." So they're a bit of an angel so I was very lucky. For a while we ate  
398 separate meals and then we both decided we were quite lonely so we started to combine  
399 them, which was much nicer (Participant 14).

400  
401 I liked working with Research Coordinator and Research Dietitians, that was fantastic, great  
402 support from both of them ... I don't think people could really do this sensibly without that



403 kind of support, it's hard. And reflecting back on it. There are a few habits that I've gone  
404 back to (Participant 15).

405  
406 This reflects research that argues providing consistent interpersonal support from family and  
407 delivery teams is pivotal for ketogenic diet interventions [48-50]. Some participants reported that  
408 close monitoring by the research clinicians gave them confidence in the study's procedures.

409 I thought the support was really good. The dietitian was phoning you all the time and if you  
410 had questions, you could contact people, so you didn't feel alone in a particular way  
411 (Participant 3).

412  
413 Participants also commented on the contact time between themselves and the research  
414 clinicians (typically at least one diet review meeting per week). Most felt that this was adequate,  
415 while for some *'it was probably better than I thought it would be* (Participant 4).' Most participants  
416 appreciated the responsiveness of the study team, their reassurance, and the way in which the diet,  
417 through the provision of recipes and resources, was tailored to their individual needs and  
418 preferences by one of the dietitians. This reflects previously observed benefits of tailored dietary  
419 information [51], despite concerns about a lack of practical examples of effective tailoring to dietary  
420 preferences in real-world weight loss contexts [52].

421 I don't have issues about the amount of fat, but I do have some concerns about the kinds of  
422 fat. So the dietitian and I have worked on looking at this particular kind of fat and maybe I  
423 could switch it out for something (Participant 5).

424  
425 While social support, broadly conceived, was evidently a strong facilitatory factor for participants  
426 and should be considered as a component of a future trial, it also played an important role among  
427 research clinicians delivering the intervention.

#### 428 *Teamwork*

429 This pilot study had numerous components and involved a large team of people drawn from  
430 different academic and healthcare backgrounds. For example, psychiatry, radiology, neurology,  
431 dietetics and behavioural sciences. It was apparent that the cohesiveness of the research  
432 intervention team contributed to the feasibility of implementation. All research clinicians  
433 interviewed commented on the strength of the teamwork they experienced.

434 There were situations where I needed to contact The Study Coordinator, she responded  
435 quickly and we managed to resolve any issues or any further information ... I did have  
436 someone else to direct any of the queries to and they were picked up and actioned by The  
437 Study Coordinator (Research Dietitian 2).

438  
439 Underpinning this teamwork was a sense of effective communication and the use of modelling.

440 It was useful having the dietitian there as well because I talked it through with The Study  
441 Coordinator in the practice session, to sort of make sure that I was comfortable. There was a  
442 bit of delay between that session and seeing my first participant. The dietitian stepped in to  
443 do it again, so I got another viewing of actually how to [support] (Research Psychiatrist 2).

444  
445 This supports research that indicates implementation of complex, multispecialty clinical studies may  
446 require foundations of effective teamwork and communication strategies [53]. Shared study  
447 leadership and regular meetings between clinical and research staff, as used in this pilot, are  
448 considered important features of teamwork that can bridge and embrace different specialities [54].

#### 449 *Technology*

450 Different forms of technology were used during the study. These included text messaging,  
451 video calling and an app. Originally, all participants were supposed to have access to two apps  
452 through devices such as their mobile phones, to support logging and transfer of data from daily  
453 capillary readings and mood scales [4]. However, due to licensing issues, only participants recruited  
454 later into the study were able to access the Ketomojo app (for capillary readings). The use of the app  
455 was welcomed by both participants and research clinicians.

456 I think the app is essential for moving forward ... That's because all I did was pull up the  
457 device, draw the blood and then put it to one side and then carry on. If I had been able to  
458 log in the emotional stuff at that point it would have been good (Participant 5).

459  
460 Rather than them text, they moved their data to Ketomojo. That was easy as well. Also,  
461 because if they forgot to send their data one day or they forgot to text it, we would text  
462 them to remind them to send it. Whereas if it was on the Ketomojo app, it was already there  
463 (Research Dietitian 1).

464  
465 These experiences demonstrate how the use of technological developments can support with  
466 behaviour change techniques, such as prompts [43], but also contribute to the potential  
467 acceptability and feasibility of an intervention. Future trials may wish to explore the role of  
468 technological components more fully, including developments such as continuous ketone

469 monitoring [55, 56]. The effective use of technology in the delivery of the intervention has the  
470 potential to reduce barriers such as the administrative burden on both participants and research  
471 clinicians.

#### 472 Theme 4 – Intervention barriers

473 All participants and research clinicians commented on a range of potential barriers to the  
474 intervention. Broadly, these comprised those relating to implementation and delivery of the  
475 intervention, or constraints at the individual-level for participants. These were generally factors that  
476 could be managed during the intervention period, or have acceptable solutions for the future.

#### 477 *The testing burden*

478 As part of the pilot, participants had initial and follow up meetings with a research dietitian  
479 and psychiatrist, as well as pre- and post-intervention blood tests and MRI scans. They were also  
480 asked to measure blood ketone and glucose levels and recorded elements of their mental state on a  
481 daily basis [4]. Many commented favourably on the comprehensiveness of these processes.  
482 However, some participants considered the testing regimen (i.e. both for outcomes and as part of  
483 the intervention) to be burdensome.

484 The very first [day of tests], I was exhausted. I'd come down from the north of Scotland and I  
485 didn't quite know where I was going then. I eventually got myself there and I think there was  
486 a lot of questions. So it was quite heavy going to be honest ... And then the next day I had  
487 the MRI and I didn't sleep terribly well in the hotel. I fell asleep in the MRI (Participant 3).

488  
489 This was also recognised by the research clinicians.

490 It could feel quite a lot seeing two people in one day, but I think it was perfectly  
491 manageable. I suppose, thinking from the participants' point of view, it might have been too  
492 much. I tended to see them first, and so my bit was relatively more straightforward, but I  
493 know that they then give them lots of information with Research Dietitian 1. But she gave  
494 them chance to consolidate that (Research Psychiatrist 1).

495  
496 The idea of a physical and emotional burden around the testing components of the study was also  
497 evident in relation to daily blood capillary readings for ketone and glucose levels. Some found the  
498 prospect of *'finger pricking every day for two months, quite a lot to get your head round* (Participant

499 1),’ while others felt a strong sense of responsibility to ensure that they were testing appropriately  
500 and providing good data.

501 I would worry that things had been recorded properly. Especially when I had to deal with  
502 two separate apps and for me it was so important that I did this properly. Like if I was going  
503 to do it, I was going to do it 100 per cent, as best as I could, you know what I mean?  
504 (Participant 1).

505  
506 Our findings reflect previous diabetes-related research that highlighted the potentially intensive and  
507 burdensome nature of daily self-monitoring of blood glucose and ketone levels [57, 58]. Several  
508 participants commented on the importance of reassurance, education and a positive baseline testing  
509 experience for their engagement and adherence. In future trials, research clinicians should adopt a  
510 flexible approach to supporting emotional reactions to testing and continue to provide individualised  
511 assistance if required [57].

512 I was struggling with the Ketomojo device at the very start. I couldn’t seem to draw blood, I  
513 couldn’t seem to get the blood in the little thing, and it ended up The Study Coordinator was  
514 on the phone with me talking me through it (Participant 5).

515  
516 *Capacity of the delivery team*

517 Three of the four research clinicians interviewed commented on difficulties they sometimes  
518 had with the study administration. Our findings highlighted ways that may support with these  
519 intervention-related tasks in future, for example the use of technology.

520 The paperwork burden is quite big, so you wonder about whether that could be done in a  
521 paper-light fashion so it could just be done online (Research Dietitian 2).  
522  
523 However, technology is no guarantee of a reduced administrative burden in clinical trials [59]. Some  
524 other challenges faced by the research clinicians were more measurement-related.

525 It was necessarily participant facing. It was just slightly tricky at points to arrange MRI scans  
526 at the research facility at the right time, because they only had fixed slots, and clearly  
527 participants have busy lives. That was quite often more difficult. Sometimes, when we were  
528 booking people in quite last minute, to find them hotels, the university service didn’t always  
529 have hotels available that quickly (Research Psychiatrist 1).

530  
531 While impossible to offer a ‘walk-in’ service, these findings suggest that in any future larger trials,  
532 there needs to be sufficient capacity among the delivery team to undertake the administrative task

533 load. Further, it may be necessary to increase the support available to participants, particularly  
534 dietetics.

535 If it's a bigger number, you will need more dietitians... I mean, just to give you an example,  
536 when I said to you that we started seven people in one month, generally, within epilepsy,  
537 you would maybe start two or three a month. So starting seven in a month was hard, but it  
538 is doable. I think it would be important to know where our study participants were coming  
539 from, because our volunteers were all well [euthymic] people with bipolar disorder  
540 (Research Dietitian 1).

541

#### 542 *Dietary preferences*

543 The experienced ketogenic dietitians worked closely with participants to tailor the  
544 intervention. This input ensured that, as far as was practicable, the prescribed recipes and  
545 suggestions reduced the risk of monotony associated with the diet [60], and aligned with  
546 participants' dietary preferences. Unsurprisingly, some participants commented that there were  
547 aspects of the diet they did not like [61].

548 It was very hard to consume that amount of fat each day, that was another thing I wasn't  
549 aware, that's what the keto diet was all about. So, you know, you weigh out olive oil in the  
550 salad, you're basically drinking olive oil at the end of the salad (Participant 15).

551

552 Research in paediatric groups has shown that dietary preferences have mixed impact on the  
553 ketogenic diet. For example, while existing preference for high-fat food types is not considered to  
554 influence adherence [62], overall dietary preferences are one of the strongest drivers of  
555 discontinuation [63]. There remains work to be done to better understand the role of preferences in  
556 adults with bipolar disorder, who can experience concomitant challenges of disordered eating.

#### 557 *Participants' concerns*

558 It was apparent that participants had concerns about their involvement in this study, with  
559 some reporting in interviews that on occasions they experienced an elevated state of arousal or  
560 anxiety.

561 I think I was always a bit edgy about have I prepared. I was a bit hungry as well sometimes  
562 and it works as an appetite suppressant. I was a bit edgy about, just in general feeling that  
563 keto, keto, always talking about keto (Participant 4).

564

565 While concerns were generally perceived as mild and easily managed through self-regulation  
566 strategies, and the majority of participants experienced stable or improved mood lability, a minority  
567 of participants expressed feeling particularly anxious about the potential impact of the diet on their  
568 mood state, toward either hypomania/mania or depression, even if this did not occur.

569 One of the concerns I had was going into hypomania, just because of the change in my diet,  
570 big change and how that would impact my mood (Participant 12).

571

572 I suddenly got this anxiety that I was going to trigger a depressive episode, which I haven't  
573 had for several years ... The kids go to their dad's about 40 per cent of the time, so I don't  
574 have much backup (Participant 2).

575

576 At the time of entry into the study, participants were euthymic; only one participant experienced a  
577 period of hypomania and another a depressive episode during the intervention period, each lasting  
578 one month [4]. Nevertheless, these examples highlight the importance of understanding perceptions  
579 of mood among participants with bipolar disorder. In particular, while lifestyle changes have  
580 typically been studied for their therapeutic potential, little attention has been paid to how stressful  
581 or disruptive these may be. While all participants in the study had at least some contact with a  
582 psychiatrist on the study team [4], given that there is some evidence around the triggering effects of  
583 stress on depressive episodes in particular [64], it may be prudent for future studies to consider  
584 more regular psychological or psychiatric support and monitoring to identify and manage difficulties,  
585 which may arise from stress-related concerns about the diet .

586 *Theme 5 – The wider context*

587 Our findings further demonstrated the benefit of process evaluation for identifying  
588 contextual factors associated with variation in participants' experiences and outcomes in clinical  
589 studies [16]. Across the interviews, participants discussed various influences that either supported or  
590 constrained their engagement with, or adherence to, the intervention.

591 *Social pressures*

592 Most participants commented on the interaction between their individual involvement in  
593 the study and wider social environments. Two-thirds discussed how the study influenced their family

594 life. For many this was manageable, but for those with complex family circumstances, this presented  
595 a considerable barrier to participation.

596 I'm a single parent of young children and I'm living on benefits. I'm doing voluntary work; I  
597 facilitate a self-help group ... one of my children's medical diagnosis played a role [in  
598 withdrawing from the study]. So, what happened was, staying overnight, having the brain  
599 scan and coming back, is really draining on my energy. I needed to organise childcare  
600 because I'm a single parent. It threw me slightly out of my routine. My child picked up on my  
601 stress and got quite disoriented, because we were doing things like, one day each week after  
602 school is my other child's sports club ... and this is what they'd got in their head. But this  
603 time I went via Lidl to get a particular Greek yoghurt that was important in the diet, and they  
604 just got so agitated, they nearly had a meltdown in the supermarket, because we'd gone off  
605 our normal (Participant 2).

606  
607 Previous research on the ketogenic diet for children demonstrated the impact on family members,  
608 for example through nonacceptance of the diet or disruption of family routines, including mealtimes  
609 [48, 65]. Our findings extend knowledge by uncovering similar patterns within the context of adults  
610 with bipolar disorder. Notably, our study suggests that participation in the intervention may  
611 adversely affect those who have caring roles within their families (*e.g.* for dependent children or  
612 older relatives). Similar pressures, at least in the early stages of the intervention, were also identified  
613 in other social settings.

614 The majority of participants mentioned how being on a ketogenic diet limited their abilities  
615 to socialise in ways they were accustomed. Some recalled needing to manage questions from others  
616 about their diet.

617 It was a wedding, a ladies' evening, two graduations, so a formal dinner. And we talked  
618 about how to cope with that. And for the wedding, I took my little Pyrex dish of salad and  
619 avo[cado] and bacon ... And I coped fine with it. I had to cope with questions about it but  
620 that was fine (Participant 15).

621  
622 While in most cases participants adapted to the social aspect of the diet over time, felt supported to  
623 handle such situations and perceived peoples' reactions to be '*understanding and cool with it*  
624 (Participant 6),' some found this created a talking point that raised the risk of unwanted disclosure  
625 about their condition.

626 One other thing is your disclosure status, because it's quite a visible thing to be doing, to be  
627 eating so differently. And if people don't know your diagnosis or why you're doing it and  
628 stuff, that is just a level of complication, why are you doing it so strictly? ... I kept myself to  
629 myself quite a bit, and the people that know my situation were the people that I tended to  
630 spend more time with. But with others I just used to say I'm on a diet (Participant 6).

631  
632 The challenges of eating in social settings are an everyday reality for adults following a ketogenic  
633 diet; in many cases these are temporary as people learn to manage the challenges of the diet [66].  
634 'Keto-friendly' mitigation strategies, such as bringing one's own meals to social events, are common.

635 Some participants also commented on how the diet interacted with their work lives. This  
636 relationship remains under-researched.

637 A lot of work commitments and things made parts of the diet difficult to do, but that was  
638 purely down to work more than anything else ... the four o'clock [data] returns could be a bit  
639 tricky around work as well, but I understand why it was at that time of the day (Participant  
640 11).

641  
642 Most of these participants felt that being unemployed or able to work from home was a key factor in  
643 affording time to prepare meals and balance the requirements of the study around their other  
644 commitments. They recognised that others may be less fortunate, and there were several instances  
645 of people working away from home choosing to skip meals, struggling to find appropriate food in  
646 shops, or failing to return timely capillary blood readings.

#### 647 *Keto in a cost-of-living crisis*

648 The pilot study took place toward the start of a period of significant economic uncertainty in  
649 the United Kingdom, characterised by high inflation and global unrest driving-up food and domestic  
650 energy prices [67]. It is notable that most participants in this study were from middle-to-higher  
651 socioeconomic backgrounds, according to SIMD data. This was reflected in many responses  
652 speculating about the potential impact of a ketogenic diet for those with less financial means.  
653 However, several participants also commented on their direct experiences of the costs associated  
654 with the intervention.



655 Yes, I think it [the bills] definitely increased. I had to buy stuff for me and then different stuff  
656 for my kids. It is quite a high protein diet so that is usually a bit more expensive than carbs  
657 and then fish, fruit and veg. Things like raspberries are quite expensive (Participant 4).

658  
659 Generally, the ketogenic diet is considered to be expensive for consumers compared to other diets  
660 [48, 63]. Participants recognised this as a potential barrier to those struggling with the cost-of-living,  
661 as food prices increased by 9.2% in the year to December 2022 [68]. A concurrent decrease in meat,  
662 fish and dairy sales was observed across Scotland among the general population, due to rising costs  
663 [69]. Selecting such foods appropriate for the diet in this context highlights the imperative for  
664 intensive support from ketogenic dietitians, alongside other financial-related strategies to reimburse  
665 out-of-pocket expenses as provided in the present study (e.g. travel to testing sites), to ensure  
666 inclusivity of the intervention. Mitigating the effects of a cost-of-living crisis is crucial to avoid  
667 inequalities in recruitment, adherence and health outcomes. Further economic studies are required.

#### 668 Further suggestions for developments in future trials

669 Participants and research clinicians alike made numerous suggestions for developments that  
670 should be considered in related future research trials. Broadly, these related to behavioural,  
671 communication, delivery, material, psychological, social and technological factors (see Additional file  
672 5). Some of these were addressed over the course of the pilot, for example enabling automated  
673 transfer of daily blood glucose readings to the research team [4]. The two most common suggestions  
674 from participants were as follows.

675 Seven of the 15 participants interviewed proposed the potential benefit of additional peer  
676 support for those living with this *'isolating illness* (Participant 6).' This may range from pastoral  
677 support for those who are *'struggling, [to] just pick up a phone and we can have a brief chat about it*  
678 (Participant 12),' to being motivationally *'helpful as well, with making me keep at it* (Participant 4).'

679 However, despite the potential popularity of peer support, the evidence to support this in  
680 interventions for people with severe mental illness remains equivocal [70, 71]. Any such support  
681 would need to be carefully considered in the context of potential participant blinding in trials.

682 Linked to the challenging nature of the intervention and the societal context discussed in  
683 this paper, the same number of participants also suggested future studies may consider additional  
684 material support, especially for those facing greater financial hardship or without suitable cookery  
685 skills:

686 I think the equity issue around this, and really reaching the people who, if it's shown to  
687 work, it might benefit ... And that's not always the case for people and they don't all have  
688 the same amount of support as I do. So I suppose for some people financial incentives might  
689 be a deal-breaker, and help buying the food or giving the food (Participant 6).

690 While direct financial aid and in-kind contribution, such as the provision of food parcels or pre-  
691 prepared meals on prescription [5], may support engagement among individuals from lower  
692 socioeconomic backgrounds (none of the participants interviewed were resident in the lowest SIMD  
693 quintile), people with bipolar disorder may be at greater risk of having difficulty cooking food for  
694 themselves [72]. This may be compounded by the complexities of preparing food in the ketogenic  
695 diet [5].

#### 697 [Quantitative findings – fidelity checklists](#)

698 Overall, there were 104 diet review meetings in which fidelity checklists were completed  
699 between participants and a research dietitian. Twenty-five of 26 participants who commenced the  
700 diet had at least one recorded meeting. Among these, 20 participants completed the diet for at least  
701 6 weeks. Of these 20, most had five review meetings (n=15), while three participants had four  
702 (including one who declined to work through the checklist in their first meeting); two participants  
703 had three and six meetings, respectively. The remaining five participants had either one or two  
704 review meetings each.

705 It was intended for most, not necessarily all, behavioural components to be addressed in a  
706 single meeting, while ensuring that all were considered over the duration of the intervention. Each  
707 was addressed, as intended, at least once with 17 of the 20 participants who completed the diet for  
708 at least 6 weeks. Most components were addressed on multiple occasions with all participants.

709 Before and after adjustment for participant withdrawal, the overall percentage of meetings that  
710 addressed a majority of components was 77%.

711

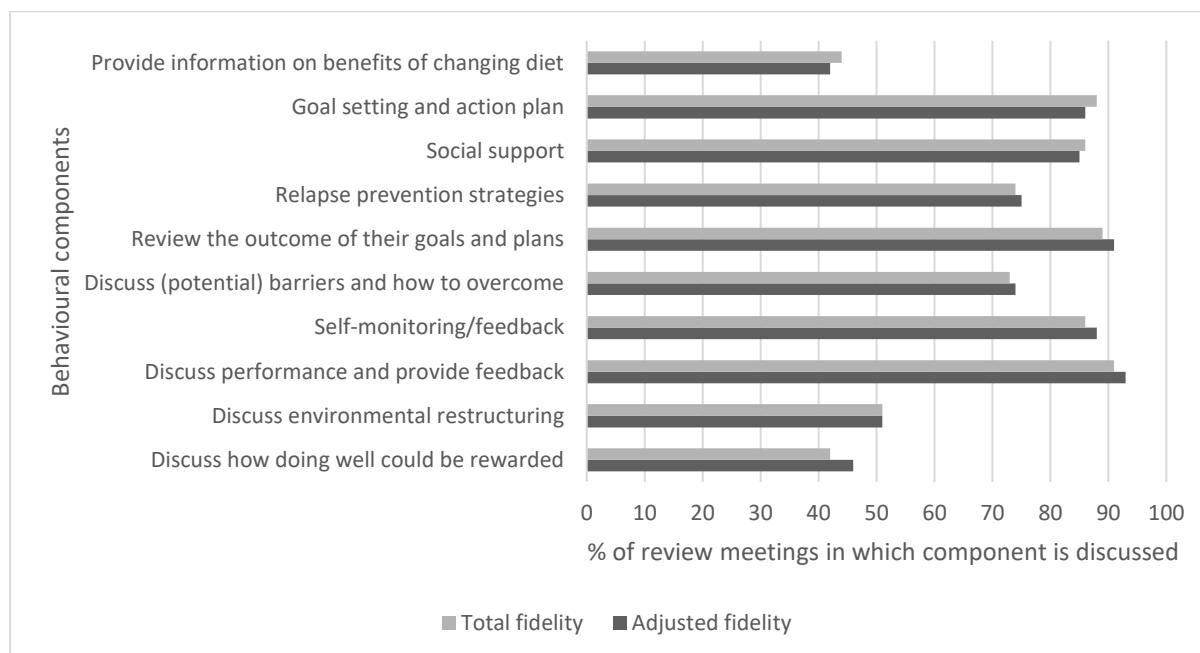

712

713 **Figure 1.** Fidelity of behavioural components implemented in diet review meetings

714 Figure 1 shows the percentage of diet review meetings in which the intended components  
715 were either discussed or implemented. Several behavioural components for the intervention were  
716 delivered with good fidelity. The most common component was discussing performance and  
717 providing feedback, which was documented in 93% of recorded checklists (91% non-adjusted).  
718 Setting and reviewing goals and action plans also featured prominently, perhaps reflecting its  
719 importance for people with bipolar disorder as it gives structure to their daily activities  
720 [24]. Meanwhile, three behavioural components were addressed less often. Providing information to  
721 participants on the benefits of changing their diet was discussed in 42% of meetings (44% non-  
722 adjusted); 70% of all instances in which this component was raised occurred during the first two  
723 review meetings across all participants. Discussing environmental restructuring occurred in 51% of  
724 meetings, and there did not appear to be any pattern to when this component was addressed.  
725 Finally, discussing how doing well could be rewarded was addressed in 46% of meetings (42% non-

726 adjusted). Free text comments indicated that many participants felt that this was typically an  
727 unnecessary consideration, while one dietitian stated during their process evaluation interview that  
728 they *'sometimes found that one a little bit tricky ... a little but more of a struggle to think of*  
729 *potentially what the reward could be* (Research Dietitian 1).' This reflects previous research that  
730 suggests people find it difficult to consider non-food-based rewards for people on ketogenic diets  
731 [49]. It is proposed that participants may respond well to contingent rewards such as praise and  
732 encouragement in dietary interventions, which can support motivation and self-efficacy [73].

733 While many behaviour change techniques were implemented throughout the intervention  
734 period, the findings suggest that different techniques may have been used for different participants  
735 at various stages. This reflects the potential that different techniques may be more appropriate at  
736 certain times, and may better work for different people according to context and delivery method  
737 [74]. Further, different processes may need to be activated according to people's readiness for  
738 dietary change [75]. This highlights the need to facilitate and understand participant expectations,  
739 and build rapport between participants and dietitians, for example through regular diet review  
740 meetings as in this pilot. It also indicates the importance of behavioural science support in future  
741 trials.

742 Overall, data indicated moderate-to-good fidelity to the behaviour change components of  
743 the intervention and have provided useful insights that can inform refinements to the behavioural  
744 strategies in future trials. Interviews with dietitians suggested that they both found the fidelity  
745 checklist a useful resource.

746 Because of fidelity questionnaire and because of the questionnaire that we had around  
747 things like adverse events ... structured the interviews quite well. They were mostly all  
748 questions I would have asked anyway. So therefore being able to just sort of have that there,  
749 and you were recording as you were going along, then yeah, they were beneficial in that  
750 respect (Research Psychiatrist 2).  
751

752 Checklists are an important strategy for examining fidelity in process evaluations and have been  
753 successfully used in dietary interventions [76, 77]. While positive experiences of using the checklist  
754 were reported in this study, there is emerging research to suggest that additional trialling of  
755 checklists at the onset of a study may improve application [78].

## 756 [Strengths and limitations of the study](#)

757 This pilot study was among the first to demonstrate the feasibility, acceptability and safety  
758 of a ketogenic diet intervention for bipolar disorder [4, 15]. The process evaluation presented in this  
759 paper reinforces these observations. The intervention was theory-based and informed by current  
760 evidence regarding successful behaviour change techniques in dietary interventions. We used a  
761 rigorous multiple methods approach to data collection and analysis, and were able to triangulate  
762 data to strengthen the findings. Our research was further strengthened by the inclusion of 70% of all  
763 participants who continued the diet for 6 weeks and who completed follow-up assessments. We  
764 provide under-investigated insight into the experiences of people living with bipolar disorder  
765 initiating and following a ketogenic diet, as well as those of research clinicians who support this  
766 behavioural intervention.

767 However, our findings need to be considered in light of limitations in the study design and  
768 sampling. The post-hoc design of this study and short intervention period meant that findings and  
769 recommendations could not be addressed and further tested during the study. We were only able to  
770 arrange an interview with one participant who had withdrawn from the study and as such, may not  
771 have uncovered additional barriers and constraining contextual factors to engagement with a  
772 ketogenic diet. Relatedly, none of the participants in our sample were from the lowest  
773 socioeconomic areas (SIMD), where barriers may differ. Future studies should explore the potential  
774 need for additional support for these groups and others at risk of drop-out, to better understand  
775 contextual facilitators or constraints on their participation and adherence. A final limitation of our  
776 sample of research clinicians was that we only interviewed dietitians and psychiatrists. Further  
777 research is needed to understand the roles of other researchers involved in similar studies, such as

778 imaging teams, given the potential importance of perceived positive baseline testing to the overall  
779 participant experience (*i.e.* feeling informed, cared for, and generally at ease). Additional areas of  
780 future work include further exploration of the motivation and engagement of the family in relation  
781 to providing social support, and mechanisms of dietary change.

## 782 Conclusions

783 The findings provide valuable insight into the process of delivering and engaging in a  
784 ketogenic diet intervention for people living with bipolar disorder. In doing so, we highlight how  
785 challenging the ketogenic diet can be for some participants. However, for most people the  
786 intervention was considered feasible and acceptable and was delivered with good fidelity. Many  
787 participants reported a range of physical and psychological benefits, despite common side-effects,  
788 some less-positive experiences and some disruption to elements of daily and social living. To offset  
789 or overcome barriers such as dietary preferences, concerns about the diet and its possible impact,  
790 administrative burdens and limited implementation capacity, we advocate the incorporation of  
791 varied behavioural and social support strategies and technology assisted monitoring. Future trials  
792 may benefit from increased researcher/research team capacity, better-defined intervention entry  
793 and exit routes, additional interpersonal support, and a greater understanding of how social and  
794 societal factors impact participation among people with bipolar disorder, particularly among those  
795 most likely to be affected by these.

## 796 [Electronic supplementary material](#)

797 Additional file 1: Interview topic guide (pilot participants)

798 Additional file 2: Interview topic guide (research clinicians)

799 Additional file 3: Intervention fidelity checklist

800 Additional file 4: Perceived benefits and down-sides of the ketogenic diet reported during interviews

801 Additional file 5: Suggestions for developments in future trials

## 802 [List of abbreviations](#)

803 BMI Body mass index

804 RCT Randomised controlled trial

805 SIMD Scottish Index of Multiple Deprivation

## 806 [Declarations](#)

### 807 [Ethics approval and consent to participate](#)

808 The study received a favourable ethical opinion from the South East Scotland Research Ethics  
809 Committee 02 (approval number: 22/SS/0007) and was approved by NHS Lothian Research and  
810 Development (2022/0009). Sponsorship was provided by the Academic and Clinical Central Office for  
811 Research and Development. Written informed consent was obtained from all participants. The study  
812 was prospectively registered in the ISRCTN Registry under registration number ISRCTN61613198 on  
813 2 March 2022.

### 814 [Consent for publication](#)

815 Not applicable.

### 816 [Availability of data and materials](#)

817 Data generated and analysed during the current study are not publicly available as explicit consent  
818 was not sought from participants, and privacy may be compromised.

### 819 [Competing interests](#)

820 IHC has a diagnosis of bipolar disorder and follows a ketogenic diet to manage his symptoms. His  
821 current fellowship is funded by the Baszucki Research Fund.

## 822 [Funding](#)

823 This study was funded by the Baszucki Brain Research Fund. BPR and SAS acknowledge funding from  
824 the UKRI Medical Research Council (MC\_UU\_00022/1) and the Chief Scientist Office of the Scottish  
825 Government Health Directorates (SPHSU16). MJT acknowledges funding from the Chief Scientist  
826 Office of the Scottish Government Health Directorates through the NHS Lothian Research and  
827 Development Office.

828 [Authors' contributions](#)

829 All authors contributed to the conceptualisation and design of the process evaluation. NN, HG and  
830 BPR were responsible for sampling and recruitment. HG and CF collected the fidelity checklist data;  
831 NN, HG, IK were responsible for the preparation of checklist fidelity data for analysis. BPR was  
832 responsible for interview data collection. BPR, SAS were responsible for analysis of the data. Data  
833 were interpreted by BPR, SAS (qualitative data) and BPR, SAS, NN, HG, IK (quantitative data), and  
834 these interpretations were discussed among all authors through team meetings. BPR was  
835 responsible for drafting the paper. All authors were involved in subsequent revisions and agree to be  
836 accountable for all aspects of the work.

837 [Acknowledgements](#)

838 We the authors wish to thank all participants and research clinicians who were involved in this  
839 research project.

Pre-print version



## 840 References

- 841 1. Anderson IM, Haddad PM, Scott J. Bipolar disorder. *BMJ*. 2012;345:e8508.  
842
- 843 2. Merikangas KR, Jin R, He J-P, Kessler RC, Lee S, Sampson NA, et al. Prevalence and correlates  
844 of bipolar spectrum disorder in the world mental health survey initiative. *Arch Gen*  
845 *Psychiatry*. 2011;68:241-251.  
846
- 847 3. Miller C, Bauer MS. Excess mortality in bipolar disorders. *Curr Psychiatry Rep*. 2014;16:1-7.  
848
- 849 4. Needham N, Campbell IH, Grossi H, Kamenska I, Rigby BP, Simpson SA, et al. Pilot study of a  
850 ketogenic diet in bipolar disorder. *BJPsych Open*. 2023;9:e176.  
851
- 852 5. Martin-McGill K, Lambert B, Whiteley V, Wood S, Neal E, Simpson Z, et al. Understanding the  
853 core principles of a 'modified ketogenic diet': a UK and Ireland perspective. *J Hum Nutr Diet*.  
854 2019;32(3):385-390.  
855
- 856 6. Martin-McGill KJ, Bresnahan R, Levy RG, Cooper PN. Ketogenic diets for drug-resistant  
857 epilepsy. *Cochrane Database Syst Rev*. 2020;6:CD001903.  
858
- 859 7. Palmer CM, Gilbert-Jaramillo J, Westman EC. The ketogenic diet and remission of psychotic  
860 symptoms in schizophrenia: two case studies. *Schizophr Res*. 2019;208:439-440.  
861
- 862 8. Phelps JR, Siemers SV, El-Mallakh RS. The ketogenic diet for type II bipolar disorder.  
863 *Neurocase*. 2013;19:423-426.  
864
- 865 9. Sethi S, Wakeman D, Ketter T, Hooshmand F, Bjorstead J, Richards B, et al. Ketogenic diet  
866 intervention on metabolic and psychiatric health in bipolar and schizophrenia: a pilot trial.  
867 *Psychiatry Res*. 2024;335:115866.  
868
- 869 10. Brietzke E, Mansur RB, Subramaniapillai M, Balanzá-Martínez V, Vinberg M, González-Pinto  
870 A, et al. Ketogenic diet as a metabolic therapy for mood disorders: evidence and  
871 developments. *Neurosci Biobehav Rev*. 2018;94:11-16.  
872
- 873 11. Campbell IH, Campbell H. Ketosis and bipolar disorder: controlled analytic study of online  
874 reports. *BJPsych Open*. 2019;5:e58.  
875
- 876 12. Campbell IH, Campbell H, Smith DJ. Insulin signaling as a therapeutic mechanism of lithium  
877 in bipolar disorder. *Transl Psychiatry*. 2022;12:350.  
878
- 879 13. Łojko D, Owecki M, Suwalska A. Impaired glucose metabolism in bipolar patients: the role of  
880 psychiatrists in its detection and management. *Int J Environ Res Public Health*.  
881 2019;16:1132.  
882
- 883 14. Yoshimi N, Futamura T, Bergen S, Iwayama Y, Ishima T, Sellgren C, et al. Cerebrospinal fluid  
884 metabolomics identifies a key role of isocitrate dehydrogenase in bipolar disorder: evidence  
885 in support of mitochondrial dysfunction hypothesis. *Mol psychiatry*. 2016;21:1504-1510.  
886
- 887 15. Campbell IH, Needham N, Grossi H, Kamenska I, Luz S, Sheehan S, et al. A pilot study of a  
888 ketogenic diet in bipolar disorder: clinical, metabolomic and magnetic resonance  
889 spectroscopy outcomes. *MedRxiv*. 2023; doi:2023.10. 23.23297391.  
890

- 891 16. Moore GF, Audrey S, Barker M, Bond L, Bonell C, Hardeman W, et al. Process evaluation of  
892 complex interventions: Medical Research Council guidance. *BMJ*. 2015;350:h1258.  
893
- 894 17. Cheng KK, Metcalfe A. Qualitative methods and process evaluation in clinical trials context:  
895 where to head to? *Int J Qual Methods*. 2018;17:1-4.  
896
- 897 18. Loue S, Sajatovic M. Research with severely mentally ill Latinas: successful recruitment and  
898 retention strategies. *J Immigr Minor Health*. 2008;10:145-153.  
899
- 900 19. Misra S, Socherman R, Hauser P, Ganzini L. Appreciation of research information in patients  
901 with bipolar disorder. *Bipolar Disord*. 2008;10:635-646.  
902
- 903 20. Harvey PD, Wingo AP, Burdick KE, Baldessarini RJ. Cognition and disability in bipolar  
904 disorder: lessons from schizophrenia research. *Bipolar Disord*. 2010;12:364-375.  
905
- 906 21. Lopes Neri LdC, Guglielmetti M, Fiorini S, Pasca L, Zanaboni MP, de Giorgis V, et al.  
907 Adherence to ketogenic dietary therapies in epilepsy: a systematic review of literature. *Nutr*  
908 *Res*. 2024;126:67-87.  
909
- 910 22. Schoeler NE, Wood S, Aldridge V, Sander JW, Cross JH, Sisodiya SM. Ketogenic dietary  
911 therapies for adults with epilepsy: feasibility and classification of response. *Epilepsy Behav*.  
912 2014;37:77-81.  
913
- 914 23. Ye F, Li X-J, Jiang W-L, Sun H-B, Liu J. Efficacy of and patient compliance with a ketogenic diet  
915 in adults with intractable epilepsy: a meta-analysis. *J Clin Neurol*. 2015;11(1):26.  
916
- 917 24. Bauer IE, Galvez JF, Hamilton JE, Balanza-Martinez V, Zunta-Soares GB, Soares JC, Meyer TD.  
918 Lifestyle interventions targeting dietary habits and exercise in bipolar disorder: a systematic  
919 review. *J Psychiatric Res*. 2016;74:1-7.  
920
- 921 25. Michie S, Van Stralen MM, West R. The behaviour change wheel: a new method for  
922 characterising and designing behaviour change interventions. *Implement Sci*. 2011;6:1-12.  
923
- 924 26. Bandura A. Social foundations of thought and action. In: Marks D, editor. *The Health*  
925 *Psychology Reader*. Thousand Oaks, CA: Sage; 1986 p. 94-106.  
926
- 927 27. Ng JY, Ntoumanis N, Thøgersen-Ntoumani C, Deci EL, Ryan RM, Duda JL, Williams GC. Self-  
928 determination theory applied to health contexts: a meta-analysis. *Perspect Psychol Sci*.  
929 2012;7:325-340.  
930
- 931 28. Britten N. Qualitative research: qualitative interviews in medical research. *BMJ*.  
932 1995;311:251-253.  
933
- 934 29. Braun V, Clarke V. Using thematic analysis in psychology. *Qual Res Psychol*. 2006;3:77-101.  
935
- 936 30. Lim L, Nathan P, O'Brien-Malone A, Williams S. A qualitative approach to identifying  
937 psychosocial issues faced by bipolar patients. *J Nerv Ment Dis*. 2004;192:810-817.  
938
- 939 31. Vancampfort D, Madou T, Moens H, De Backer T, Vanhalst P, Helon C, et al. Could  
940 autonomous motivation hold the key to successfully implementing lifestyle changes in  
941 affective disorders? A multicentre cross sectional study. *Psychiatry Res*. 2015;228:100-106.

- 942  
943 32. Tully A, Smyth S, Conway Y, Geddes J, Devane D, Kelly JP, Jordan F. Interventions for the  
944 management of obesity in people with bipolar disorder. *Cochrane Database Syst Rev*.  
945 2020;7:CD12006.  
946  
947 33. Bos FM, Snippe E, Bruggeman R, Doornbos B, Wichers M, van der Krieke L.  
948 Recommendations for the use of long-term experience sampling in bipolar disorder care: a  
949 qualitative study of patient and clinician experiences. *Int J Bipolar Disord*. 2020;8:1-14.  
950  
951 34. Berk M, Berk L, Castle D. A collaborative approach to the treatment alliance in bipolar  
952 disorder. *Bipolar Disord*. 2004;6:504-518.  
953  
954 35. Health Talks [Internet]. 2018. Clinical trials: feelings when a trial ends; cited 2024 May 09.  
955 Available from: <https://healthtalk.org/experiences/clinical-trials/feelings-when-a-trial-ends/#:~:text=Some%20people%20described%20a%20mixture,side%20effects%20or%20other%20discomfort>.  
956  
957  
958  
959 36. Giacco D. Loneliness and mood disorders: consequence, cause and/or unholy alliance? *Curr*  
960 *Opin Psychiatry*. 2023;36:47-53.  
961  
962 37. Giacco D, Palumbo C, Strappelli N, Catapano F, Priebe S. Social contacts and loneliness in  
963 people with psychotic and mood disorders. *Compr psychiatry*. 2016;66:59-66.  
964  
965 38. Bergqvist AC, Schall JI, Gallagher PR, Cnaan A, Stallings VA. Fasting versus gradual initiation  
966 of the ketogenic diet: a prospective, randomized clinical trial of efficacy. *Epilepsia*.  
967 2005;46:1810-1819.  
968  
969 39. Bostock E, Kirkby KC, Taylor BV, Hawrelak JA. Consumer reports of “keto flu” associated with  
970 the ketogenic diet. *Front Nutr*. 2020;7:20.  
971  
972 40. Alharbi A, Al-Sowayan NS. The effect of ketogenic-diet on health. *Food Nutr Sci*.  
973 2020;11:301-313.  
974  
975 41. Timlin D, McCormack JM, Kerr M, Keaver L, Simpson EE. Are dietary interventions with a  
976 behaviour change theoretical framework effective in changing dietary patterns? A  
977 systematic review. *BMC Public Health*. 2020;20:1-18.  
978  
979 42. Lin H, Xu D, Yang M, Ma X, Yan N, Chen H, et al. Behaviour change techniques that constitute  
980 effective planning interventions to improve physical activity and diet behaviour for people  
981 with chronic conditions: a systematic review. *BMJ Open*. 2022;12:e058229.  
982  
983 43. Whatnall MC, Patterson AJ, Ashton LM, Hutchesson MJ. Effectiveness of brief nutrition  
984 interventions on dietary behaviours in adults: a systematic review. *Appetite*. 2018;120:335-  
985 347.  
986  
987 44. Murray G, Suto M, Hole R, Hale S, Amari E, Michalak EE. Self-management strategies used by  
988 ‘high functioning’ individuals with bipolar disorder: from research to clinical practice. *Clin*  
989 *Psychol Psychother*. 2011;18:95-109.  
990  
991 45. Shilts MK, Horowitz M, Townsend MS. Goal setting as a strategy for dietary and physical  
992 activity behavior change: a review of the literature. *Am J Health Promot*. 2004;19:81-93.

- 993  
994 46. Janney CA, Bauer MS, Kilbourne AM. Self-management and bipolar disorder – a clinician’s  
995 guide to the literature 2011-2014. *Curr Psychiatry*. 2014;16:1-15.  
996  
997 47. Ironside ML, Johnson SL, Carver CS. Identity in bipolar disorder: self-worth and achievement.  
998 *J Pers*. 2020;88:45-58.  
999  
1000 48. Lynch S, Barry C, Douglass LM. Social and Economic Challenges to Implementing the  
1001 Ketogenic Diet: A Case Series. *J Pediatr Epilepsy*. 2020;10:37-42.  
1002  
1003 49. Orr E, Whitney R, Nandeesh N, Kossoff EH, Ramachandran Nair R. Ketogenic diet: parental  
1004 experiences and expectations. *J Child Neurol*. 2024;39:45-54.  
1005  
1006 50. Sindler D, Kastovska B, Dostal T, Cipryan L, Elavsky S. The effects of carbohydrate-restricted  
1007 diet on psychological outcomes: a systematic review of randomized controlled trials. *Nutr*  
1008 *Rev*. 2024;82:228-239.  
1009  
1010 51. Eyles HC, Mhurchu CN. Does tailoring make a difference? A systematic review of the long-  
1011 term effectiveness of tailored nutrition education for adults. *Nutr Rev*. 2009;67:464-480.  
1012  
1013 52. Gibson AA, Sainsbury A. Strategies to improve adherence to dietary weight loss  
1014 interventions in research and real-world settings. *Behav Sci*. 2017;7:44.  
1015  
1016 53. Butryn T, Cornejo K, Wojda TR, Papadimos TJ, Gerlach AT, Deb L, et al. Keys to success in  
1017 clinical trials: a practical review. *Int J Acad Med*. 2016;2:203-216.  
1018  
1019 54. Strong S, Paramasivan S, Mills N, Wilson C, Donovan JL, Blazeby JM. ‘The trial is owned by  
1020 the team, not by an individual’: a qualitative study exploring the role of teamwork in  
1021 recruitment to randomised controlled trials in surgical oncology. *Trials*. 2016;17:1-9  
1022  
1023 55. Alva S, Castorino K, Cho H, Ou J. Feasibility of continuous ketone monitoring in subcutaneous  
1024 tissue using a ketone sensor. *Journal of Diabetes Science and Technology*. 2021;15(4):768-  
1025 74.  
1026  
1027 56. Nguyen KT, Xu NY, Zhang JY, Shang T, Basu A, Bergenstal RM, et al. Continuous ketone  
1028 monitoring consensus report 2021. *J Diabetes Sci Technol*. 2022;16:689-715.  
1029  
1030 57. Chen CM, Chang Yeh M. The experiences of diabetics on self-monitoring of blood glucose: a  
1031 qualitative metasynthesis. *J Clin Nurs*. 2015;24:614-626.  
1032  
1033 58. Weber C, Kocher S, Neeser K, Joshi SR. Prevention of diabetic ketoacidosis and self-  
1034 monitoring of ketone bodies: an overview. *Curr Med Res Opin*. 2009;25:1197-1207.  
1035  
1036 59. Easy M. The key to reducing administrative burden for clinical trials. *Physicians Pract*. 2023.  
1037  
1038 60. Arora N, Pulimamidi S, Yadav H, Jain S, Glover J, Dombrowski K, et al. Intermittent fasting  
1039 with ketogenic diet: A combination approach for management of chronic diseases. *Clin Nutr*  
1040 *ESPEN*. 2023;54:166-74.  
1041  
1042 61. Newson L, Parody FH. Investigating the experiences of low-carbohydrate diets for people  
1043 living with Type 2 Diabetes: a thematic analysis. *PloS One*. 2022;17:e0273422.

- 1044  
1045 62. Dekker C, Van Den Hurk T, Van Nieuwenhuizen O. Does a preference for fatty foods prior to  
1046 commencing treatment with the ketogenic diet predict the efficacy of this diet? *Seizure*.  
1047 2010;19:421-425.  
1048  
1049 63. Lightstone L, Shinnar S, Callahan CM, O'Dell C. Reasons for failure of the ketogenic diet. *J*  
1050 *Neurosci Nurs*. 2001;33:292-295.  
1051  
1052 64. Proudfoot J, Whitton A, Parker G, Doran J, Manicavasagar V, Delmas K. Triggers of mania and  
1053 depression in young adults with bipolar disorder. *J Affect Disord*. 2012;143:196-202.  
1054  
1055 65. Webster M, Gabe J. Diet and identity: Being a good parent in the face of contradictions  
1056 presented by the ketogenic diet. *Sociol Health Illn*. 2016;38:123-136.  
1057  
1058 66. Wong K, Raffray M, Roy-Fleming A, Blunden S, Brazeau A-S. Ketogenic diet as a normal way  
1059 of eating in adults with type 1 and type 2 diabetes: a qualitative study. *Can J Diabetes*.  
1060 2021;45:137-143.  
1061  
1062 67. Webster P, Neal K. The 'cost of living crisis'. *J Public Health*; 2022;44:475-476.  
1063  
1064 68. Scott E [Internet]. 2023. Cost of living: food price inflation; cited 2024 May 09. Available  
1065 from: [https://lordslibrary.parliament.uk/cost-of-living-food-price-](https://lordslibrary.parliament.uk/cost-of-living-food-price-inflation/#:~:text=In%20December%202022%2C%20food%20price,December%202021%20and%20December%202022.)  
1066 [inflation/#:~:text=In%20December%202022%2C%20food%20price,December%202021%20a](https://lordslibrary.parliament.uk/cost-of-living-food-price-inflation/#:~:text=In%20December%202022%2C%20food%20price,December%202021%20and%20December%202022.)  
1067 [nd%20December%202022.](https://lordslibrary.parliament.uk/cost-of-living-food-price-inflation/#:~:text=In%20December%202022%2C%20food%20price,December%202021%20and%20December%202022.)  
1068  
1069 69. Hunter P. [Internet]. 2022. Households slash food budgets: meat, fish, poultry sales down  
1070 6.6%; cited 2024 May 09. Available from:  
1071 [https://www.thescottishfarmer.co.uk/business\\_sales/23146208.cost-living-crisis-hits-uk-](https://www.thescottishfarmer.co.uk/business_sales/23146208.cost-living-crisis-hits-uk-meat-dairy-sales/)  
1072 [meat-dairy-sales/](https://www.thescottishfarmer.co.uk/business_sales/23146208.cost-living-crisis-hits-uk-meat-dairy-sales/)  
1073  
1074 70. Lloyd-Evans B, Mayo-Wilson E, Harrison B, Istead H, Brown E, Pilling S, et al. A systematic  
1075 review and meta-analysis of randomised controlled trials of peer support for people with  
1076 severe mental illness. *BMC Psychiatry*. 2014;14:1-12.  
1077  
1078 71. Fortuna KL, Naslund JA, LaCroix JM, Bianco CL, Brooks JM, Zisman-Ilani Y, et al. Digital peer  
1079 support mental health interventions for people with a lived experience of a serious mental  
1080 illness: systematic review. *JMIR Ment Health*. 2020;7:e16460.  
1081  
1082 72. Kilbourne AM, Rofey DL, McCarthy JF, Post EP, Welsh D, Blow FC. Nutrition and exercise  
1083 behavior among patients with bipolar disorder 1. *Bipolar Disord*. 2007;9:443-52.  
1084  
1085 73. Prestwich A, Kellar I, Parker R, MacRae S, Learmonth M, Sykes B, et al. How can self-efficacy  
1086 be increased? Meta-analysis of dietary interventions. *Health psychology review*.  
1087 2014;8(3):270-85.  
1088  
1089 74. Armitage CJ, Conner M, Prestwich A, de Bruin M, Johnston M, Sniehotta F, Epton T.  
1090 Investigating which behaviour change techniques work for whom in which contexts  
1091 delivered by what means: Proposal for an international collaborative of Centres for  
1092 Understanding Behaviour Change (CUBiC). *Br J Health Psychol*. 2021;26:1-14.  
1093

- 1094 75. Horwath CC. Applying the transtheoretical model to eating behaviour change: challenges  
1095 and opportunities. *Nutr Res Rev.* 1999;12:281-317.  
1096
- 1097 76. Beck AK, Baker AL, Carter G, Robinson L, McCarter K, Wratten C, et al. Is fidelity to a complex  
1098 behaviour change intervention associated with patient outcomes? Exploring the relationship  
1099 between dietitian adherence and competence and the nutritional status of intervention  
1100 patients in a successful stepped-wedge randomised clinical trial of eating as treatment (EAT).  
1101 *Implement Sci.* 2021;16:1-10.  
1102
- 1103 77. Walton H, Spector A, Williamson M, Tombor I, Michie S. Developing quality fidelity and  
1104 engagement measures for complex health interventions. *Br J Health Psychol.* 2020;25:39-60.  
1105
- 1106 78. Baker J, Stringer H, McKean C. Ensuring treatment fidelity in intervention studies: Developing  
1107 a checklist and scoring system within a behaviour change paradigm. *Int J Commun Disord*  
1108 2024;59:379-395.

1109

Pre-print version

## 1110 Additional file 1: Interview topic guide (pilot participants)

### 1111 Preamble

1112 Today, I am going to ask you to tell us about your experiences of being involved in our study. I will  
1113 ask you about your experiences of the ketogenic diet, the support you received, and how you felt  
1114 about being a research participant. There are no right or wrong answers. Feel free to say as much or  
1115 as little as you like, and remember that you do not have to provide an answer to a question if you do  
1116 not want to. I may ask you to discuss things in a bit more detail, but if you do not feel you have  
1117 anything further to say, that is fine. Some of the things we discuss today may be sensitive, and  
1118 everything will be treated in confidence. We can take a break at any time, just let me know. If you  
1119 want to finish the interview early, please say so, and be assured that you do not need to provide a  
1120 reason for this.

1121 Are you happy for me to start the recording?

### 1122 Background and context

- 1123 • Can you tell me how long you have been living with bipolar disorder and how it has impacted  
1124 you?

### 1125 Taking part in the research: recruitment

- 1126 • How did you find out about the study? What attracted you toward it?  
1127 • What information did you receive about the study? Was it helpful/what could be improved?  
1128 • Why did you decide to participate? Did you have any initial concerns?

### 1129 Taking part in research: your experience

- 1130 • How manageable was being a participant in this study?  
1131 • Did you face any barriers to taking part as in the study?  
1132 • Were the expectations on your time realistic? How did the study fit around your existing daily  
1133 life? How did it impact those around you (*e.g.* at home or at work)?  
1134 • Did you feel able to keep up with the testing requirements (*e.g.* completing diaries or  
1135 remembering to do blood tests)?  
1136 • Can you tell me a bit about the hospital visits – How was attending for MRI scans and venous  
1137 blood tests before the study and at follow-up?  
1138 • I would like you to tell me a little bit about the different Apps and questionnaires that we used in  
1139 this study (*e.g.* were they easy to use/not; can anything make them more useful):  
1140 • How did you find completing the mental health and health economics questionnaires before the  
1141 study and at the follow-up? What did you think about being text daily for data (if used)?  
1142 • What did you think about using the Ketomojo and ilumivu apps (if used)?  
1143 • What did you think about wearing an Actigraph device on your wrist?  
1144 • Throughout this study your diet and health were very closely monitored, how did this make you  
1145 feel?  
1146 • How did taking part in this study interact with any ongoing management or treatment that you  
1147 have for bipolar disorder?  
1148 • How could we better incentivise participants to take part in a study like this?

## 1149 The diet

- 1150 • What came to mind when you thought about making changes to your diet? Did the diet meet
- 1151 your initial expectations?
- 1152 • What were the easier/harder aspects of the diet to put in place?
- 1153 • How well did it fit into your existing eating patterns (*e.g.* were you able to retain the same
- 1154 mealtimes/did you find yourself snacking more)?
- 1155 • Was there anything that you did to help you 'stick to' the diet? How was this helpful/not?
- 1156 • What did you like and dislike about the ketogenic diet?

## 1157 Support package

- 1158 • During the study, what type of help (info/resources/support) was the most helpful in relation to
- 1159 the diet? What was least helpful? Why?
- 1160 • What do you think about the individualised recipe leaflets that you were provided?
- 1161 • Did you use the keto-calculator? If so, what did you think about this?
- 1162 • Thinking about the research dietitian...
- 1163 • Can you tell me a little bit about the initial meeting, how did that go?
- 1164 • What support did you receive from them regarding the diet? Did you ask for anything specific?
- 1165 • How did you choose to interact with them (*e.g.* telephone, email, face-to-face)? Do you have a
- 1166 preference, and if so, why? How much contact time do you think is about right?
- 1167 • How did the support you received compare to the expectations that you had at the start of the
- 1168 diet?
- 1169 • Thinking about the study coordinator:
- 1170 • Did you engage with them? If so, are you happy to tell me about that experience?
- 1171 • What support did you receive from them regarding the study and diet?
- 1172 • How much contact time with the study team do you think is about right?

## 1173 Outcomes

- 1174 • Has the study helped you? How/why not?
- 1175 • How have things changed for you as a result of the study? Have you seen changes in other parts
- 1176 of your life apart from diet?
- 1177 • Did you experience any negative side-effects from the diet? How did you manage these? How
- 1178 long did they last, were they tolerable?

## 1179 General

- 1180 • What was the most important positive aspect of this experience for you?
- 1181 • Is there anything important that you would recommend that we change about i) the study; or ii)
- 1182 the ketogenic diet intervention, if we were to do it again?
- 1183 • Do you have any further thoughts or reflections about this study?



## 1184 Additional file 2: Interview topic guide (research clinicians)

1185 Today, I am going to ask you to speak about your experiences of being involved in the study as a  
1186 research clinician. I will ask you about your experiences of implementing the intervention and  
1187 supporting participants. There are no right or wrong answers, and you should feel free to say as  
1188 much or as little as you like. You do not have to provide an answer to a question if you do not want  
1189 to. I may ask you to expand on your answers at times, but if you do not feel you have anything  
1190 further to say, that is fine. We can take a break at any time, just let me know. Everything we discuss  
1191 will be treated in confidence. If you want to finish the interview at any time, you can do so without  
1192 needing to provide a reason for this.

1193 Are you happy for me to start the recording?

### 1194 General experiences

- 1195 • Can you tell me a bit about your experience of working on this study? How did you find it?

### 1196 Implementing the study

- 1197 • Did you find the study paperwork easy to complete? If not, what issues were there?
- 1198 • What were the barriers/facilitators for you to implementing the intervention? How did you try to  
1199 overcome any barriers that you faced?
- 1200 • What was your experience of using the Apps and other monitoring tools? Did you feel suitably  
1201 equipped to support participants with these?
- 1202 • Considering the fidelity checklist ... was this useful?
- 1203 • Which components of the intervention (including the behavioural strategies) did you implement  
1204 more or less often?
- 1205 • How did you try to incorporate the different behavioural strategies? Were any particularly  
1206 easy/challenging to use?
- 1207 • Were there aspects of the study that you struggled to implement as intended? If so, why?
- 1208 • Did you make any changes to the way the intervention was delivered from the protocol?
- 1209 • How did delivering the intervention and the different study components correspond to your  
1210 usual working practices? Was it challenging?

### 1211 Participants

- 1212 • Through what media did the participants engage with you? What were the kinds of reasons they  
1213 would get in touch?
- 1214 • From your perspective what seemed to be the barriers/facilitators to participant engagement  
1215 with the diet?

### 1216 Moving forward

- 1217 • If we were to conduct this study in future...
- 1218 • What additional support would research clinicians require?
- 1219 • Do you have any suggestions as to how you might improve compliance with the diet?
- 1220 • Do you have suggestions as to how we might increase recruitment into the study?
- 1221 • Is there anything important that you would recommend that we change about the study or the  
1222 intervention if we were to do it again, and why?
- 1223 • Do you have any further thoughts or reflections about this study?

1224 Additional file 3: Intervention fidelity checklist

1225

1226

**Session recording scoring sheet – Intervention sessions**

1227 **Dietitian name:**

1228 **Date:**

1229 **Participant ID:**

1230

| Element                                                                                                                                                           | 1 | 0 | Comments |
|-------------------------------------------------------------------------------------------------------------------------------------------------------------------|---|---|----------|
| Provide information on benefits of changing diet (e.g. the medical and personal benefits, thinking of the intervention not as a diet but a medication/treatment). |   |   |          |
| Goal setting and a plan of action: (i.e. set or discuss/review goals to change behaviour).                                                                        |   |   |          |
| Social support (e.g. identify relevant family/friends who can offer support; other people also on keto diet e.g. via cooking classes)                             |   |   |          |
| Relapse prevention strategies (e.g. ways to avoid eating certain foods; not putting themselves in certain situations)                                             |   |   |          |
| Review the outcome of their goals and plans (i.e. were the patient's achievement of their goals/progress discussed).                                              |   |   |          |
| Discuss (potential) barriers and how to overcome these (e.g. side effects, potential negative influence of family members).                                       |   |   |          |

|                                                                                         |  |  |  |
|-----------------------------------------------------------------------------------------|--|--|--|
| Self-monitoring/feedback (e.g. monitoring blood every day; monitoring mood).            |  |  |  |
| Discuss participant's performance (including success/failure) and provide feedback.     |  |  |  |
| Discuss environmental restructuring options (e.g. get rid of biscuits in the cupboard). |  |  |  |
| Discuss how doing well could be rewarded (e.g. a trip to the cinema or other treat).    |  |  |  |
| General comments.                                                                       |  |  |  |

1231

1232 1 = element conducted; 0 = element not conducted

Pre-print version

1233 Additional file 4: Perceived benefits and down-sides of the ketogenic  
 1234 diet reported during interviews  
 1235

| Perceived benefit           | Illustrative quotation                                                                                                                                                                                                                                                                                                                                                                                                                                                                                                                                                                                                                            |
|-----------------------------|---------------------------------------------------------------------------------------------------------------------------------------------------------------------------------------------------------------------------------------------------------------------------------------------------------------------------------------------------------------------------------------------------------------------------------------------------------------------------------------------------------------------------------------------------------------------------------------------------------------------------------------------------|
| Blood sugar levels          | Plus, I didn't seem to have, like I say, I don't want to keep going on about my blood sugars, but I didn't seem to have spikes in my bloods, which I've experienced before the diet, and a bit afterwards as well (Participant 7).                                                                                                                                                                                                                                                                                                                                                                                                                |
| Discipline and self-control | I think for a number of the participants, their dietary habits and even their meal patterns and things, they had been quite erratic. And even, you felt that that would give benefit, to be given that support and advice and then, hopefully, they would feel the benefit from the diet, as well as they started to make the changes. Because there were a few, yeah, definitely, as you say, that their patterns, the number of meals that they had, the regularity of them, wasn't, it wasn't normal. But I think, yeah, I think it helped to give them that support and direction to make changes around that as well (Research Dietitian 3). |
| Energy stability            | I would say that I think it is initially lower energy, but ultimately more stable energy and no deficit in a sense, but also definitely, it doesn't, in a sense the low energy probably is a good thing if you're trying to avoid mania, or extreme mixed episodes. So I would say those things it does do (Participant 8).                                                                                                                                                                                                                                                                                                                       |
| Generally feeling healthier | Like I say, just the enlightenment of how much diet actually affects you and whether it's feeling better physically improves your mental health or whether it's specifically just affecting my mental health, I don't know (Participant 11).                                                                                                                                                                                                                                                                                                                                                                                                      |
| Mood stability              | I think even within the first two weeks, I felt like I got my brain back. It was an exceptionally stressful time, and it was nothing to do with the study. It just was in my life, like a lot of stress or highly stressful things to deal with. But I managed okay. I kept things to myself. I kept thinking to myself other times in my life this would've sent me under by now. These things would've sent me under, into some spiral of either high anxiety or depression (Participant 1).                                                                                                                                                    |

1236

| Perceived benefit           | Illustrative quotation                                                                                                                                                                                                                                                     |
|-----------------------------|----------------------------------------------------------------------------------------------------------------------------------------------------------------------------------------------------------------------------------------------------------------------------|
| Self-efficacy               | So yeah, it's given me confidence to go forward with it as sort of just a way of doing things. I've done all the hard work of working it all out (Participant 13).                                                                                                         |
| Reduced alcohol consumption | And it's actually altered my entire approach to using alcohol other than as a nice drink with a meal, you know, it's a good thing. And it's very positive, yeah (Participant 15).                                                                                          |
| Reduced cravings            | I found myself snacking much less because the fat immediately stopped my cravings, levelled me out, which is great. But obviously four meals a day I'm not used to that so I had a meal, lunch in the evening, which was new but I enjoyed it (Participant 14).            |
| Weight loss                 | Well what I liked about it was the weight loss because I put on far too much weight ... I was like, this is sensible weight loss and look at this, I'm still eating the same plate of food and it didn't feel at any time that I was having to go hungry (Participant 13). |

1237

| Perceived down-side     | Illustrative quotation                                                                                                                                                                                                                                             |
|-------------------------|--------------------------------------------------------------------------------------------------------------------------------------------------------------------------------------------------------------------------------------------------------------------|
| Changes to bowel habits | Bowel issues definitely changed, I would say they definitely slowed down and so I take selenium husk probably once a day usually and that's fine, but if I don't do that then I definitely get constipation which I've never had before actually (Participant 14). |
| Feeling disheartened    | No. well, the only time is that time, when I returned my stats that day, I was feeling awful, so I did say that (Participant 11).                                                                                                                                  |
| Impact on exercise      | I guess it impacted exercise to a certain extent. I think I still continued to exercise regardless of feeling a bit fatigued and low in energy because I do use it as a self-management tool (Participant 15).                                                     |
| No benefit              | I do not believe that adopting a ketogenic diet for six to eight or ten weeks ... I don't think you can verify if that helps in any way (Participant 5).                                                                                                           |
| Sleep difficulties      | There was sometimes that I couldn't sleep as well actually (Participant 6).                                                                                                                                                                                        |
| Smoking behaviour       | I ended up smoking more which wasn't a great side effect (Participant 4).                                                                                                                                                                                          |

1238

1239

1240 Additional file 5: Suggestions for developments in future trials

1241

| Category         | Suggestions by participants                                                                                                             | Suggestions by research clinicians                                                                                                                                      |
|------------------|-----------------------------------------------------------------------------------------------------------------------------------------|-------------------------------------------------------------------------------------------------------------------------------------------------------------------------|
| Behavioural      | Incorporating a physical activity component alongside dietary component of the intervention.                                            | -                                                                                                                                                                       |
| Communication    | Ensuring more detail about the realities of the diet and commitment are communicated to participants to set clear expectations.         |                                                                                                                                                                         |
|                  | Making more resources available in digital formats.                                                                                     | -                                                                                                                                                                       |
|                  | Promoting the extensive of support for participants in the intervention at the point of recruitment.                                    | -                                                                                                                                                                       |
|                  | Providing individualised feedback to participants based on their test results.                                                          | -                                                                                                                                                                       |
|                  | Simplifying written materials and resources associated with the dietary intervention and research project.                              | -                                                                                                                                                                       |
| Delivery         | Ensuring research clinicians have experience of this sort of intervention.                                                              | Ensuring sufficient capacity among research clinicians to reduce the participant caseload.                                                                              |
|                  | Increasing the number of pre- and post-intervention testing sites (i.e. more hospitals), to reduce cost and disruption to participants. | Increasing numbers among research clinicians, including ensuring the clear delegation at times of staff absence.                                                        |
| Delivery (cont.) | Incorporating a longer trial or transition period to support participants to make the substantial dietary changes required.             | Linking to participants' existing treatment and care teams, for example having access to medical records and communicating with primary care and psychiatry colleagues. |

1242

1243

| <b>Category</b> | <b>Suggestions by participants</b>                                                                                                             | <b>Suggestions by research clinicians</b>                                                                                                       |
|-----------------|------------------------------------------------------------------------------------------------------------------------------------------------|-------------------------------------------------------------------------------------------------------------------------------------------------|
| Material        | Providing education or cooking lessons for preparing ketogenic meals.                                                                          | Ensuring participant expenses reimbursement system is working efficiently.                                                                      |
|                 | Providing support for the purchasing of appropriate foods, for example money, vouchers or direct provision of food parcels and prepared meals. | -                                                                                                                                               |
| Psychological   | Incorporating a psychological therapeutic component, such as talking therapy, alongside dietary component of the intervention.                 | -                                                                                                                                               |
| Social          | Incorporating a peer support mechanism, such as a buddy system, to support transition to diet, adherence and motivation.                       | Providing additional targeted support for most at risk individuals, such as newly diagnosed or those with complex family or work circumstances. |
| Technological   | Providing more video call options for diet review meetings, as opposed to telephone reviews.                                                   | Converting materials and resources to digital copies, to reduce amount of paper and increase efficiency.                                        |
|                 | Using apps and continued blood monitoring devices to automate the data collection process for mood questionnaires and ketone levels.           |                                                                                                                                                 |

1244
